# Supplementary material for: Urban-scale analysis of the seasonal trend of stabilized-Criegee intermediates and their effect on sulphate formation in the Greater Tokyo Area
Source: Royal Society of Chemistry journal article supplement (doi:10.1039/d3ea00105a), 2023-01-01
Supplement: d3ea00105a1.pdf [file d3ea00105a1.pdf]

# Urban-scale analysis of the seasonal trend of stabilized-Criegee intermediates and their effect to sulfate formation in the Greater Tokyo Area

Yuya NAKAMURA<sup>a</sup>, Hiroo HATA<sup>b,\*</sup>, and Kenichi TONOKURA<sup>a,c,\*\*</sup>

*a. Department of Chemical System Engineering, Faculty of Engineering, The University of Tokyo, 7-3-1 Hongo, Bunkyo-ku, Tokyo 113-8656, Japan.*

*b. Research Institute of Science for Safety and Sustainability, National Institute of Advanced Industrial Science and Technology (AIST), 16-1 Onogawa, Tsukuba, Ibaraki 305-8569, Japan*

*c. Department of Environment Systems, Graduate School of Frontier Sciences, The University of Tokyo, 5-1-5 Kashiwanoha, Kashiwa, Chiba 277-8563, Japan*

\*Corresponding author (Hiroo Hata): [hata-hiroo@aist.go.jp](mailto:hata-hiroo@aist.go.jp)

\*\*Corresponding author (Kenichi Tonokura): [tonokura@k.u-tokyo.ac.jp](mailto:tonokura@k.u-tokyo.ac.jp)

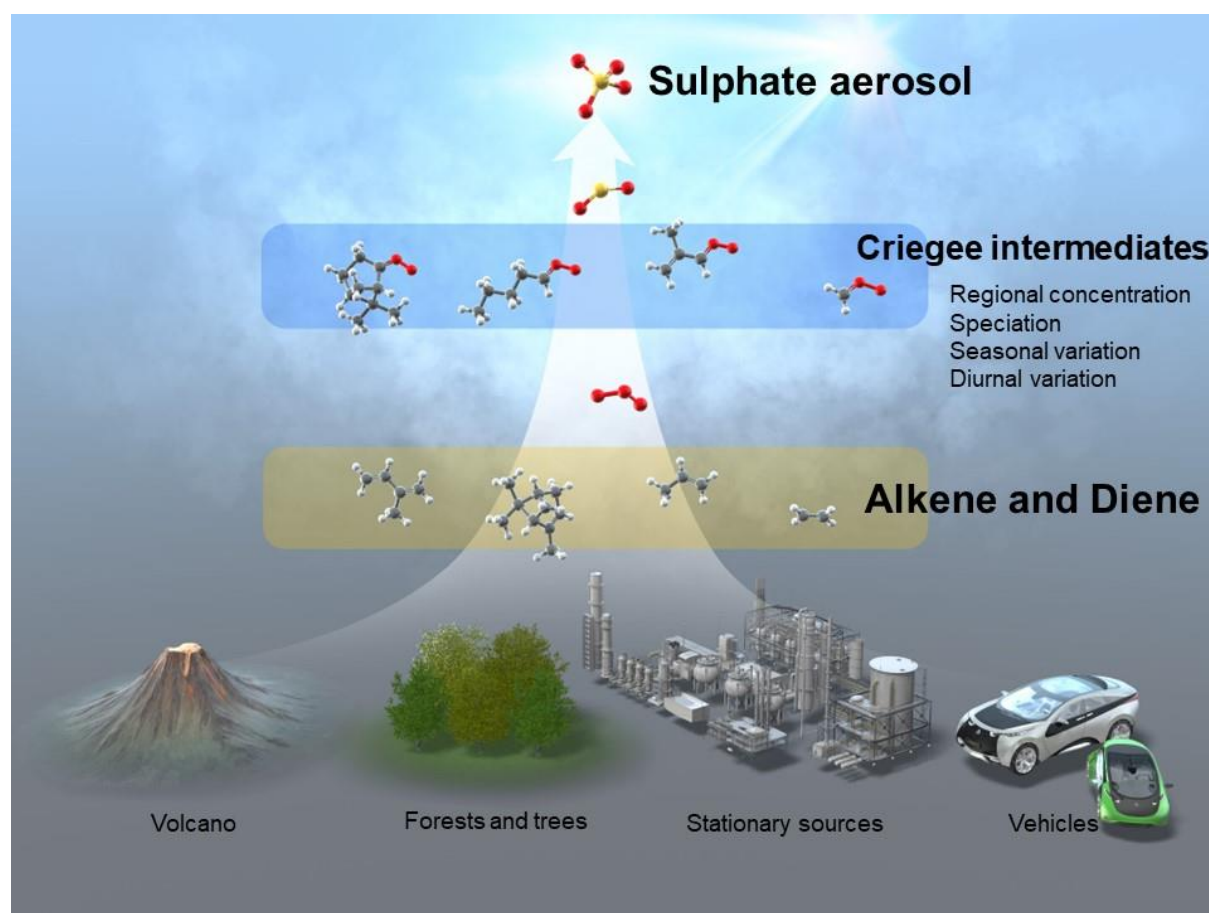

Table S1: Calculation setup for CMAQ.

| Model                          | CMAQv5.2.1                                   |
|--------------------------------|----------------------------------------------|
| Boundary condition (D1)        | MOZART-4/GEOS5                               |
| Boundary condition (D2 and D3) | Nested from parent domain                    |
| Initial condition (D1)         | CMAQ default (profile)                       |
| Initial condition (D2 and D3)  | Nested from parent domain                    |
| Number of grids                | 207 × 157 (D1), 141 × 147 (D2), 51 × 57 (D3) |
| Gas chemistry                  | saprc07tc                                    |
| Aerosol chemistry              | aero6                                        |
| Aqueous chemistry              | cloud_acm_ae6                                |
| Photolysis                     | phot_inline                                  |
| Horizontal advection           | yamo                                         |
| Vertical advection             | wrf                                          |
| Horizontal diffusion           | hdiff/multiscale                             |
| Vertical diffusion             | vdiff/acm2                                   |
| Dry deposition                 | m3dry                                        |

Table S2: sCI generation reactions incorporated into SAPRC-07.

| alkenes             | Products of alkene ozonolysis                                                                                                                                                                                                                                                                               |
|---------------------|-------------------------------------------------------------------------------------------------------------------------------------------------------------------------------------------------------------------------------------------------------------------------------------------------------------|
| ethene              | $\text{HCHO} + 0.37*\text{SCI1} + 0.13*\text{HO2} + 0.13*\text{OH} + 0.63*\text{CO}$                                                                                                                                                                                                                        |
| propene             | $0.5*\text{CCHO} + 0.5*\text{HCHO} + 0.12*\text{SCI1} + 0.06*\text{ESCI2} + 0.06*\text{ZSCI2} + 0.82*\text{HO2} + 0.36*\text{OH} + 0.56*\text{CO} + 0.28*\text{MEO2}$                                                                                                                                       |
| 1,3-butadiene       | $0.5*\text{HCHO} + 0.5*\text{ACROLEIN} + 0.12*\text{SCI1} + 0.06*\text{ESCI7} + 0.06*\text{ZSCI7} + 0.42*\text{HO2} + 0.08*\text{OH} + 0.59*\text{CO} + 0.17*\text{ETHENE}$                                                                                                                                 |
| isoprene            | $0.20*\text{MVK} + 0.30*\text{MACR} + 0.11*\text{SCI1} + 0.022*\text{ESCI8} + 0.022*\text{ZSCI8} + 0.033*\text{ESCI9} + 0.033*\text{ZSCI9} + 0.271*\text{HO2} + 0.27*\text{OH} + 0.522*\text{CO} + 0.7085*\text{HCHO} + 0.051*\text{MEO2} + 0.027*\text{RO2C} + 0.027*\text{RO2XC} + 0.1275*\text{PROPENE}$ |
| $\alpha$ -pinene    | $0.10*\text{ESCI10} + 0.10*\text{ZSCI10} + 0.80*\text{OH} + 0.20*\text{CO} + 0.40*\text{RO2C} + 0.40*\text{RO2XC}$                                                                                                                                                                                          |
| methyl vinyl ketone | $0.60*\text{HCHO} + 0.12*\text{SCI1} + 0.06*\text{ESCI12} + 0.06*\text{ZSCI12} + 0.78*\text{HO2} + 0.36*\text{OH} + 1.06*\text{CO} + 0.78*\text{MECO3} + 0.10*\text{CCHO}$                                                                                                                                  |
| methacrolein        | $0.5*\text{HCHO} + 0.09*\text{SCI1} + 0.045*\text{ESCI14} + 0.045*\text{ZSCI14} + 0.91*\text{HO2} + 0.82*\text{OH} + 1.32*\text{CO} + 0.91*\text{MECO3}$                                                                                                                                                    |

|                                                  |                                                                                                                                                                                                                                                                                |
|--------------------------------------------------|--------------------------------------------------------------------------------------------------------------------------------------------------------------------------------------------------------------------------------------------------------------------------------|
| acrolein                                         | 1.1*HCHO + 0.12*SCI1 + 0.06*ESCI13 + 0.06*ZSCI13 + 0.56*HO2<br>+ 0.36*OH + 1.34*CO                                                                                                                                                                                             |
| OLE1                                             | 0.12*SCI1 + 0.015*ESCI2 + 0.015*ZSCI2 + 0.015*ESCI6 + 0.015*ZSCI6<br>+ 0.015*ESCI3 + 0.015*ZSCI3 + 0.015*ESCI5 + 0.015*ZSCI5<br>+ 0.28*HO2 + 0.36*OH + 0.50*HCHO + 0.125*CCHO<br>+ 0.374*RCHO + 0.025*ALK1 + 0.025*ALK2 + 0.025*ALK4<br>+ 0.07*MEO2 + 0.105*RO2C + 0.105*RO2XC |
| OLE2                                             | 0.045*ESCI2 + 0.045*ZSCI2 + 0.0225*ESCI3 + 0.0225*ZSCI3<br>+ 0.0225*SCI1 + 0.0225*SCI4 + 0.19625*HO2 + 0.6325*OH<br>+ 0.6325*CO + 0.03125*ALK1 + 0.50*CCHO<br>+ 0.375*RCHO + 0.125*HCHO + 0.52125*MEO2<br>+ 0.225*RO2C + 0.225*RO2XC                                           |
| terpenes(C <sub>10</sub> H <sub>16</sub> )       | 0.050*ESCI10 + 0.050*ZSCI10 + 0.576*OH + 0.226*CO + 0.35*RO2C<br>+ 0.35*RO2XC + 0.30*HCHO + 0.074*SCI1 + 0.028*ESCI11<br>+ 0.028*ZSCI11 + 0.026*HO2 + 0.299*XC                                                                                                                 |
| sesquiterpenes(C <sub>15</sub> H <sub>24</sub> ) | 0.050*ESCI10 + 0.050*ZSCI10 + 0.576*OH + 0.226*CO + 0.35*RO2C<br>+ 0.35*RO2XC + 0.30*HCHO + 0.074*SCI1 + 0.028*ESCI11<br>+ 0.028*ZSCI11 + 0.026*HO2 + 0.299*XC                                                                                                                 |

a. OLE1, OLE2, TERP, and SESQ represent the lumped species of alkenes ( $k_{OH} < 7 \times 10^4$  ppm<sup>-1</sup> min<sup>-1</sup>); alkenes ( $k_{OH} > 7 \times 10^4$  ppm<sup>-1</sup> min<sup>-1</sup>); terpenes, except for  $\alpha$ -pinene; and sesquiterpenes, respectively, where  $k_{OH}$  is the rate constant of the alkenes and OH reaction. b. ESCI and ZSCI represent geometrical isomers of the *E* (*trans*-) and *Z* (*cis*-) forms of SCI. c. Other products explanation; MEO2, methyl peroxy radicals; MVK, methyl vinyl ketone; MACR, methacrolein; RO2C, peroxy radical operator representing NO to NO<sub>2</sub> and NO<sub>3</sub> to NO<sub>2</sub> conversions, and the effects of peroxy radical reactions on acyl peroxy and other peroxy radicals; RO2XC, peroxy radical operator representing NO consumption (used in conjunction with organic nitrate formation), and the effects of peroxy radical reactions on NO<sub>3</sub>, acyl peroxy radicals, and other peroxy radicals; MECO<sub>3</sub>, acetyl peroxy radicals; RCHO, Lumped C<sub>3</sub>+ Aldehydes. Mechanism based on propionaldehyde; ALK1, Alkanes and other non-aromatic compounds that react only with OH, and have  $k_{OH}$  (OH radical rate constant) between 2 and 5  $\times 10^2$  ppm<sup>-1</sup> min<sup>-1</sup>. (Primarily ethane); ALK2, Alkanes and other non-aromatic compounds that react only with OH, and have  $k_{OH}$  between 5  $\times 10^2$  and 2.5  $\times 10^3$  ppm<sup>-1</sup> min<sup>-1</sup>. (Primarily

propane); ALK4, Alkanes and other non-aromatic compounds that react only with OH, and have kOH between  $5 \times 10^3$  and  $1 \times 10^4$  ppm<sup>-1</sup> min<sup>-1</sup>; XC, Lost Carbon or carbon in unreactive products.

Table S3: List of unimolecular decomposition reactions of sCIs.

| SCI   | decomposition<br>mechanism | Products            | A<br>(s <sup>-1</sup> ) | B    | Ea<br>(kcal mol <sup>-1</sup> ) |
|-------|----------------------------|---------------------|-------------------------|------|---------------------------------|
| SCI1  | 13ring                     | HCOOH               | 1.345×10 <sup>11</sup>  | 4    | 8024                            |
| ESCI2 | 13ring                     | CCOOH               | 3.733×10 <sup>12</sup>  | 1.35 | 7445                            |
| ZSCI2 | 14Hmig                     | CO + 2*OH +<br>HCHO | 2.635×10 <sup>-2</sup>  | 25   | -2685                           |
|       | 13ring                     | CCOOH               | 4.360×10 <sup>11</sup>  | 2.98 | 10755                           |
| ESCI3 | 13ring                     | RCOOH               | 5.589×10 <sup>12</sup>  | 1.03 | 7464                            |
| ZSCI3 | 14Hmig                     | xRCHO + OH          | 3.768×10 <sup>-2</sup>  | 24.3 | -2571                           |
|       | 13ring                     | RCOOH               | 1.176×10 <sup>12</sup>  | 2.41 | 10584                           |
| SCI4  | 14Hmig                     | xACETONE + OH       | 2.204×10 <sup>-1</sup>  | 23.6 | -2367                           |
|       | 13ring                     | MEK                 | 3.816×10 <sup>12</sup>  | 1.21 | 10140                           |
| ESCI5 | 13ring                     | RCOOH               | 5.285×10 <sup>12</sup>  | 1.2  | 7380                            |
| ZSCI5 | 14Hmig                     | xRCHO + OH          | 4.178×10 <sup>-2</sup>  | 24.5 | -2490                           |
|       | 13ring                     | RCOOH               | 7.032×10 <sup>11</sup>  | 2.6  | 10562                           |
| ESCI6 | 13ring                     | RCOOH               | 5.285×10 <sup>12</sup>  | 1.2  | 7380                            |
| ZSCI6 | 14Hmig                     | xRCHO + OH          | 4.178×10 <sup>-2</sup>  | 24.5 | -2490                           |
|       | 13ring                     | RCOOH               | 7.032×10 <sup>11</sup>  | 2.6  | 10562                           |
| ESCI7 | 13ring                     | RCOOH               | 1.035×10 <sup>13</sup>  | 0.8  | 8139                            |
| ZSCI7 | 15ring                     | RCHO                | 8.715×10 <sup>11</sup>  | 0.66 | 5727                            |
|       | 13ring                     | RCOOH               | 5.026×10 <sup>11</sup>  | 2.34 | 9126                            |
| ESCI8 | 13ring                     | MEK                 | 5.517×10 <sup>12</sup>  | 0.48 | 10385                           |
|       | 14Hmig                     | xMVK + OH           | 6.265×10 <sup>-3</sup>  | 25.9 | -2737                           |

|        |        |             |                        |       |       |
|--------|--------|-------------|------------------------|-------|-------|
| ZSCI8  | 15ring | RCHO        | $1.198 \times 10^{12}$ | 0.65  | 5617  |
|        | 13ring | MEK         | $2.076 \times 10^{12}$ | 1.12  | 8291  |
| ESCI9  | 13ring | RCOOH       | $2.453 \times 10^{12}$ | 1.46  | 7832  |
| ZSCI9  | 15ring | RCHO        | $1.956 \times 10^{12}$ | 0.44  | 6102  |
|        | 13ring | RCOOH       | $8.008 \times 10^{11}$ | 1.68  | 8476  |
| ESCI10 | 13ring | PRD2        | $4.036 \times 10^{11}$ | 2.43  | 6732  |
| ZSCI10 | 14Hmig | xPROD2 + OH | $6.373 \times 10^{-1}$ | 23    | -2099 |
|        | 13ring | PRD2        | $2.802 \times 10^{11}$ | 3.45  | 9906  |
| ESCI11 | 13ring | PRD2        | $2.295 \times 10^{12}$ | 1.23  | 10358 |
|        | 14Hmig | xPROD2 + OH | $2.358 \times 10^{-1}$ | 23.27 | -2251 |
| ZSCI11 | 13ring | PRD2        | $3.744 \times 10^{12}$ | 1.33  | 8425  |
| ESCI12 | 13ring | RCOOH       | $1.176 \times 10^{12}$ | 2.3   | 9127  |
| ZSCI12 | 13ring | RCOOH       | $5.178 \times 10^{11}$ | 2.41  | 7141  |
| ESCI13 | 13ring | RCOOH       | $1.011 \times 10^{12}$ | 2.72  | 9444  |
| ZSCI13 | 13ring | RCOOH       | $7.424 \times 10^{11}$ | 2.21  | 6656  |
| ESCI14 | 14Hmig | xRCHO + OH  | $2.375 \times 10^{-5}$ | 30.08 | -3644 |
|        | 13ring | RCHO        | $1.439 \times 10^{12}$ | 2.34  | 12328 |
| ZSCI14 | 13ring | RCHO        | $2.361 \times 10^{12}$ | 0.78  | 5162  |

MEK, Ketones and other non-aldehyde oxygenated products that react with OH radicals faster than  $5 \times 10^{-13}$  but slower than  $5 \times 10^{-12} \text{ cm}^3 \text{ molec}^{-2} \text{ sec}^{-1}$ ; PRD2, Ketones and other non-aldehyde oxygenated products that react with OH radicals faster than  $5 \times 10^{-12} \text{ cm}^3 \text{ molec}^{-2} \text{ sec}^{-1}$ . xRCHO, Formation of RCHO from alkoxy radicals formed in peroxy radical reactions with NO and NO<sub>3</sub> (100% yields) and RO<sub>2</sub> (50% yields); xACETONE, same as xRCHO, but for acetone; xPROD2 same as xRCHO, but for PRD2.

Table S4: Detailed information on sCI + water monomer (H<sub>2</sub>O). Products were estimated from the products<sup>1</sup> of the SCI1 + H<sub>2</sub>O reaction and represented in the expressions in SAPRC-07. Numbers of A, B, and Ea are the parameters of the modified Arrhenius equation ( $k(T) = A \left(\frac{T}{300}\right)^B \exp\left(-\frac{Ea}{RT}\right)$ ) cited from quantum chemical calculation results<sup>2</sup>.

| SCI    | Products                          | A<br>(cm <sup>3</sup> molec <sup>-1</sup> s <sup>-1</sup> ) | B    | Ea<br>(kcal mol <sup>-1</sup> ) |
|--------|-----------------------------------|-------------------------------------------------------------|------|---------------------------------|
| SCI1   | 0.4*HCHO + 0.55*ROOH + 0.05*HCOOH | 9.056×10 <sup>-15</sup>                                     | 1.23 | 698                             |
| ESCI2  | 0.4*CCHO + 0.55*ROOH + 0.05*CCOOH | 6.045×10 <sup>-15</sup>                                     | 1.27 | -405                            |
| ZSCI2  | 0.4*CCHO + 0.55*ROOH + 0.05*CCOOH | 3.177×10 <sup>-15</sup>                                     | 1.68 | 2513                            |
| ESCI3  | 0.4*RCHO + 0.55*ROOH + 0.05*RCOOH | 1.832×10 <sup>-15</sup>                                     | 0.92 | -652                            |
| ZSCI3  | 0.4*RCHO + 0.55*ROOH + 0.05*RCOOH | 3.413×10 <sup>-15</sup>                                     | 1.39 | 2300                            |
| SCI4   | 0.45*ACET + 0.55*ROOH             | 2.085×10 <sup>-15</sup>                                     | 1.91 | 1677                            |
| ESCI5  | 0.4*RCHO + 0.55*ROOH + 0.05*RCOOH | 1.832×10 <sup>-15</sup>                                     | 0.92 | -652                            |
| ZSCI5  | 0.4*RCHO + 0.55*ROOH + 0.05*RCOOH | 3.413×10 <sup>-15</sup>                                     | 1.39 | 2300                            |
| ESCI6  | 0.4*RCHO + 0.55*ROOH + 0.05*RCOOH | 1.832×10 <sup>-15</sup>                                     | 0.92 | -652                            |
| ZSCI6  | 0.4*RCHO + 0.55*ROOH + 0.05*RCOOH | 3.413×10 <sup>-15</sup>                                     | 1.39 | 2300                            |
| ESCI7  | 0.4*MACR + 0.55*ROOH + 0.05*RCOOH | 3.470×10 <sup>-15</sup>                                     | 1.46 | 1073                            |
| ZSCI7  | 0.4*MACR + 0.55*ROOH + 0.05*RCOOH | 2.354×10 <sup>-15</sup>                                     | 1.73 | 3059                            |
| ESCI8  | 0.45*MVK + 0.55*ROOH              | 2.924×10 <sup>-15</sup>                                     | 1.46 | 3132                            |
| ZSCI8  | 0.45*MVK + 0.55*ROOH              | 9.278×10 <sup>-16</sup>                                     | 2.27 | 1858                            |
| ESCI9  | 0.4*RCHO + 0.55*ROOH + 0.05*RCOOH | 4.351×10 <sup>-15</sup>                                     | 1.74 | 929                             |
| ZSCI9  | 0.4*RCHO + 0.55*ROOH + 0.05*RCOOH | 3.425×10 <sup>-15</sup>                                     | 1.52 | 2977                            |
| ESCI10 | 0.45*PROD2 + 0.55*R6OOH           | 1.295×10 <sup>-14</sup>                                     | 0.17 | -71                             |
| ZSCI10 | 0.45*PROD2 + 0.55*R6OOH           | 5.283×10 <sup>-17</sup>                                     | 3.83 | 1023                            |
| ESCI11 | 0.45*PROD2 + 0.55*R6OOH           | 3.030×10 <sup>-16</sup>                                     | 2.37 | 1525                            |
| ZSCI11 | 0.45*PROD2 + 0.55*R6OOH           | 2.931×10 <sup>-16</sup>                                     | 2.64 | -121                            |
| ESCI12 | 0.4*MGLY + 0.55*ROOH + 0.05*RCOOH | 9.804×10 <sup>-15</sup>                                     | 1.53 | 2258                            |
| ZSCI12 | 0.4*MGLY + 0.55*ROOH + 0.05*RCOOH | 2.435×10 <sup>-15</sup>                                     | 1.03 | -131                            |
| ESCI13 | 0.4*GLY + 0.55*ROOH + 0.05*RCOOH  | 9.804×10 <sup>-15</sup>                                     | 1.53 | 2258                            |
| ZSCI13 | 0.4*GLY + 0.55*ROOH + 0.05*RCOOH  | 2.639×10 <sup>-15</sup>                                     | 1.59 | 370                             |
| ESCI14 | 0.45*GLY + 0.55*ROOH              | 4.674×10 <sup>-15</sup>                                     | 1.87 | 4177                            |
| ZSCI14 | 0.45*GLY + 0.55*ROOH              | 1.133×10 <sup>-15</sup>                                     | 1.68 | -757                            |

ROOH, Lumped organic hydroperoxides with 2-4 carbons; R6OOH, Lumped organic hydroperoxides with five or more carbons; ACET, Acetone; MACR, Methacrolein; MVK, Methyl vinyl ketone; PROD2, Ketones and other non-aldehyde oxygenated products that react

with OH radicals faster than  $5 \times 10^{-12} \text{ cm}^3 \text{ molec}^{-2} \text{ sec}^{-1}$ ; MGLY, Methyl Glyoxal; GLY, Glyoxal.



Table S5: Detailed information on sCI + water dimer ((H<sub>2</sub>O)<sub>2</sub>). Products were estimated from the products<sup>1</sup> of the SCI1 + H<sub>2</sub>O reaction and represented in the expressions in SAPRC-07 (therefore, the products are same as that of SCI + water monomer). Numbers of A, B, and Ea are the parameters of the modified Arrhenius equation ( $k(T) = A \left(\frac{T}{300}\right)^B \exp\left(-\frac{Ea}{RT}\right)$ ). According to this table, Ea is 0 in all SCIs because there was no solution in the curve approximation when Ea was not 0. Therefore, Ea was set to 0.

| SCI    | Products                          | A<br>(cm <sup>3</sup> molec <sup>-1</sup> s <sup>-1</sup> ) | B       | Ea<br>(kcal mol <sup>-1</sup> ) |
|--------|-----------------------------------|-------------------------------------------------------------|---------|---------------------------------|
| SCI1   | 0.4*HCHO + 0.55*ROOH + 0.05*HCOOH | 2.900×10 <sup>-33</sup>                                     | -11.096 | 0                               |
| ESCI2  | 0.4*CCHO + 0.55*ROOH + 0.05*CCOOH | 4.964×10 <sup>-32</sup>                                     | -14.742 | 0                               |
| ZSCI2  | 0.4*CCHO + 0.55*ROOH + 0.05*CCOOH | 4.209×10 <sup>-36</sup>                                     | -4.8155 | 0                               |
| ESCI3  | 0.4*RCHO + 0.55*ROOH + 0.05*RCOOH | 3.251×10 <sup>-32</sup>                                     | -15.967 | 0                               |
| ZSCI3  | 0.4*RCHO + 0.55*ROOH + 0.05*RCOOH | 8.888×10 <sup>-36</sup>                                     | -5.7662 | 0                               |
| SCI4   | 0.45*ACET + 0.55*ROOH             | 3.628×10 <sup>-35</sup>                                     | -7.2807 | 0                               |
| ESCI5  | 0.4*RCHO + 0.55*ROOH + 0.05*RCOOH | 3.251×10 <sup>-32</sup>                                     | -15.967 | 0                               |
| ZSCI5  | 0.4*RCHO + 0.55*ROOH + 0.05*RCOOH | 8.888×10 <sup>-36</sup>                                     | -5.7662 | 0                               |
| ESCI6  | 0.4*RCHO + 0.55*ROOH + 0.05*RCOOH | 3.251×10 <sup>-32</sup>                                     | -15.967 | 0                               |
| ZSCI6  | 0.4*RCHO + 0.55*ROOH + 0.05*RCOOH | 8.888×10 <sup>-36</sup>                                     | -5.7662 | 0                               |
| ESCI7  | 0.4*MACR + 0.55*ROOH + 0.05*RCOOH | 3.786×10 <sup>-34</sup>                                     | -9.6829 | 0                               |
| ZSCI7  | 0.4*MACR + 0.55*ROOH + 0.05*RCOOH | 6.243×10 <sup>-37</sup>                                     | -3.0628 | 0                               |
| ESCI8  | 0.45*MVK + 0.55*ROOH              | 6.525×10 <sup>-37</sup>                                     | -3.0979 | 0                               |
| ZSCI8  | 0.45*MVK + 0.55*ROOH              | 9.914×10 <sup>-36</sup>                                     | -6.3786 | 0                               |
| ESCI9  | 0.4*RCHO + 0.55*ROOH + 0.05*RCOOH | 6.927×10 <sup>-34</sup>                                     | -9.8761 | 0                               |
| ZSCI9  | 0.4*RCHO + 0.55*ROOH + 0.05*RCOOH | 1.172×10 <sup>-36</sup>                                     | -3.5087 | 0                               |
| ESCI10 | 0.45*PROD2 + 0.55*R6OOH           | 3.308×10 <sup>-32</sup>                                     | -14.535 | 0                               |
| ZSCI10 | 0.45*PROD2 + 0.55*R6OOH           | 7.396×10 <sup>-36</sup>                                     | -7.5476 | 0                               |
| ESCI11 | 0.45*PROD2 + 0.55*R6OOH           | 7.385×10 <sup>-36</sup>                                     | -7.2284 | 0                               |
| ZSCI11 | 0.45*PROD2 + 0.55*R6OOH           | 1.145×10 <sup>-33</sup>                                     | -12.473 | 0                               |
| ESCI12 | 0.4*MGLY + 0.55*ROOH + 0.05*RCOOH | 2.718×10 <sup>-35</sup>                                     | -5.7373 | 0                               |
| ZSCI12 | 0.4*MGLY + 0.55*ROOH + 0.05*RCOOH | 8.339×10 <sup>-33</sup>                                     | -14.011 | 0                               |
| ESCI13 | 0.4*GLY + 0.55*ROOH + 0.05*RCOOH  | 2.718×10 <sup>-35</sup>                                     | -5.7373 | 0                               |
| ZSCI13 | 0.4*GLY + 0.55*ROOH + 0.05*RCOOH  | 2.161×10 <sup>-33</sup>                                     | -11.809 | 0                               |
| ESCI14 | 0.45*GLY + 0.55*ROOH              | 4.273×10 <sup>-38</sup>                                     | 0.5796  | 0                               |
| ZSCI14 | 0.45*GLY + 0.55*ROOH              | 2.702×10 <sup>-32</sup>                                     | -15.508 | 0                               |

Table S6: Detailed information on sCI + sulfur dioxide (SO<sub>2</sub>). Products were represented in the expressions in SAPRC-07. Rate constants are suggested values in the previous study.<sup>2</sup>

| SCI    | Products             | Rate Constant<br>(cm <sup>3</sup> molec <sup>-1</sup> s <sup>-1</sup> ) |
|--------|----------------------|-------------------------------------------------------------------------|
| SCI1   | HCHO + SULF + SULRXN | 3.7×10 <sup>-11</sup>                                                   |
| ESCI2  | CCHO + SULF + SULRXN | 1.4×10 <sup>-10</sup>                                                   |
| ZSCI2  | CCHO + SULF + SULRXN | 2.7×10 <sup>-11</sup>                                                   |
| ESCI3  | RCHO + SULF + SULRXN | 1.4×10 <sup>-10</sup>                                                   |
| ZSCI3  | RCHO + SULF + SULRXN | 2.7×10 <sup>-11</sup>                                                   |
| SCI4   | ACET + SULF + SULRXN | 1.6×10 <sup>-10</sup>                                                   |
| ESCI5  | RCHO + SULF + SULRXN | 1.4×10 <sup>-10</sup>                                                   |
| ZSCI5  | RCHO + SULF + SULRXN | 2.7×10 <sup>-11</sup>                                                   |
| ESCI6  | RCHO + SULF + SULRXN | 1.4×10 <sup>-10</sup>                                                   |
| ZSCI6  | RCHO + SULF + SULRXN | 2.7×10 <sup>-11</sup>                                                   |
| ESCI7  | RCHO + SULF + SULRXN | 1.4×10 <sup>-10</sup>                                                   |
| ZSCI7  | RCHO + SULF + SULRXN | 2.7×10 <sup>-11</sup>                                                   |
| ESCI8  | MVK + SULF + SULRXN  | 1.4×10 <sup>-10</sup>                                                   |
| ZSCI8  | MVK + SULF + SULRXN  | 2.7×10 <sup>-11</sup>                                                   |
| ESCI9  | RCHO + SULF + SULRXN | 1.4×10 <sup>-10</sup>                                                   |
| ZSCI9  | RCHO + SULF + SULRXN | 2.7×10 <sup>-11</sup>                                                   |
| ESCI10 | PRD2 + SULF + SULRXN | 1.4×10 <sup>-10</sup>                                                   |
| ZSCI10 | PRD2 + SULF + SULRXN | 2.7×10 <sup>-11</sup>                                                   |
| ESCI11 | PRD2 + SULF + SULRXN | 1.4×10 <sup>-10</sup>                                                   |
| ZSCI11 | PRD2 + SULF + SULRXN | 4.0×10 <sup>-11</sup>                                                   |
| ESCI12 | MGLY + SULF + SULRXN | 1.4×10 <sup>-10</sup>                                                   |
| ZSCI12 | MGLY + SULF + SULRXN | 2.7×10 <sup>-11</sup>                                                   |
| ESCI13 | GLY + SULF + SULRXN  | 1.4×10 <sup>-10</sup>                                                   |
| ZSCI13 | GLY + SULF + SULRXN  | 2.7×10 <sup>-11</sup>                                                   |
| ESCI14 | MGLY + SULF + SULRXN | 1.4×10 <sup>-10</sup>                                                   |
| ZSCI14 | MGLY + SULF + SULRXN | 2.7×10 <sup>-11</sup>                                                   |

SULF, sulfates; SULRXN, precursor of aerosol sulfate.

Table S7: Detailed information on sCI + nitrogen dioxide (NO<sub>2</sub>). Products were represented in the expressions in SAPRC-07. Rate constants are suggested values in the previous study<sup>2</sup>.

| SCI    | Products   | Rate Constant<br>(cm <sup>3</sup> molec <sup>-1</sup> s <sup>-1</sup> ) |
|--------|------------|-------------------------------------------------------------------------|
| SCI1   | HCHO + NO3 | 4.0×10 <sup>-12</sup>                                                   |
| ESCI2  | CCHO + NO3 | 4.0×10 <sup>-12</sup>                                                   |
| ZSCI2  | CCHO + NO3 | 4.0×10 <sup>-12</sup>                                                   |
| ESCI3  | RCHO + NO3 | 4.0×10 <sup>-12</sup>                                                   |
| ZSCI3  | RCHO + NO3 | 4.0×10 <sup>-12</sup>                                                   |
| SCI4   | ACET + NO3 | 4.0×10 <sup>-12</sup>                                                   |
| ESCI5  | RCHO + NO3 | 4.0×10 <sup>-12</sup>                                                   |
| ZSCI5  | RCHO + NO3 | 4.0×10 <sup>-12</sup>                                                   |
| ESCI6  | RCHO + NO3 | 4.0×10 <sup>-12</sup>                                                   |
| ZSCI6  | RCHO + NO3 | 4.0×10 <sup>-12</sup>                                                   |
| ESCI7  | RCHO + NO3 | 4.0×10 <sup>-12</sup>                                                   |
| ZSCI7  | RCHO + NO3 | 4.0×10 <sup>-12</sup>                                                   |
| ESCI8  | MVK + NO3  | 4.0×10 <sup>-12</sup>                                                   |
| ZSCI8  | MVK + NO3  | 4.0×10 <sup>-12</sup>                                                   |
| ESCI9  | RCHO + NO3 | 4.0×10 <sup>-12</sup>                                                   |
| ZSCI9  | RCHO + NO3 | 4.0×10 <sup>-12</sup>                                                   |
| ESCI10 | PRD2 + NO3 | 4.0×10 <sup>-12</sup>                                                   |
| ZSCI10 | PRD2 + NO3 | 4.0×10 <sup>-12</sup>                                                   |
| ESCI11 | PRD2 + NO3 | 4.0×10 <sup>-12</sup>                                                   |
| ZSCI11 | PRD2 + NO3 | 4.0×10 <sup>-12</sup>                                                   |
| ESCI12 | MGLY + NO3 | 4.0×10 <sup>-12</sup>                                                   |
| ZSCI12 | MGLY + NO3 | 4.0×10 <sup>-12</sup>                                                   |
| ESCI13 | GLY + NO3  | 4.0×10 <sup>-12</sup>                                                   |
| ZSCI13 | GLY + NO3  | 4.0×10 <sup>-12</sup>                                                   |
| ESCI14 | MGLY + NO3 | 4.0×10 <sup>-12</sup>                                                   |
| ZSCI14 | MGLY + NO3 | 4.0×10 <sup>-12</sup>                                                   |

Table S8: Detailed information on sCI + nitric acid (HNO<sub>3</sub>). Products were estimated from products<sup>3</sup> of SCI1 + HNO<sub>3</sub> and represented in the expressions in SAPRC-07. Rate constants are suggested values in the previous study<sup>4</sup>.

| SCI    | Products      | Rate Constant<br>(cm <sup>3</sup> molec <sup>-1</sup> s <sup>-1</sup> ) |
|--------|---------------|-------------------------------------------------------------------------|
| SCI1   | RNO3 + 0.21OH | 5.4×10 <sup>-10</sup>                                                   |
| ESCI2  | RNO3 + 0.21OH | 5.4×10 <sup>-10</sup>                                                   |
| ZSCI2  | RNO3 + 0.21OH | 5.4×10 <sup>-10</sup>                                                   |
| ESCI3  | RNO3 + 0.21OH | 5.4×10 <sup>-10</sup>                                                   |
| ZSCI3  | RNO3 + 0.21OH | 5.4×10 <sup>-10</sup>                                                   |
| SCI4   | RNO3 + 0.21OH | 5.4×10 <sup>-10</sup>                                                   |
| ESCI5  | RNO3 + 0.21OH | 5.4×10 <sup>-10</sup>                                                   |
| ZSCI5  | RNO3 + 0.21OH | 5.4×10 <sup>-10</sup>                                                   |
| ESCI6  | RNO3 + 0.21OH | 5.4×10 <sup>-10</sup>                                                   |
| ZSCI6  | RNO3 + 0.21OH | 5.4×10 <sup>-10</sup>                                                   |
| ESCI7  | RNO3 + 0.21OH | 5.4×10 <sup>-10</sup>                                                   |
| ZSCI7  | RNO3 + 0.21OH | 5.4×10 <sup>-10</sup>                                                   |
| ESCI8  | RNO3 + 0.21OH | 5.4×10 <sup>-10</sup>                                                   |
| ZSCI8  | RNO3 + 0.21OH | 5.4×10 <sup>-10</sup>                                                   |
| ESCI9  | RNO3 + 0.21OH | 5.4×10 <sup>-10</sup>                                                   |
| ZSCI9  | RNO3 + 0.21OH | 5.4×10 <sup>-10</sup>                                                   |
| ESCI10 | RNO3 + 0.21OH | 5.4×10 <sup>-10</sup>                                                   |
| ZSCI10 | RNO3 + 0.21OH | 5.4×10 <sup>-10</sup>                                                   |
| ESCI11 | RNO3 + 0.21OH | 5.4×10 <sup>-10</sup>                                                   |
| ZSCI11 | RNO3 + 0.21OH | 5.4×10 <sup>-10</sup>                                                   |
| ESCI12 | RNO3 + 0.21OH | 5.4×10 <sup>-10</sup>                                                   |
| ZSCI12 | RNO3 + 0.21OH | 5.4×10 <sup>-10</sup>                                                   |
| ESCI13 | RNO3 + 0.21OH | 5.4×10 <sup>-10</sup>                                                   |
| ZSCI13 | RNO3 + 0.21OH | 5.4×10 <sup>-10</sup>                                                   |
| ESCI14 | RNO3 + 0.21OH | 5.4×10 <sup>-10</sup>                                                   |
| ZSCI14 | RNO3 + 0.21OH | 5.4×10 <sup>-10</sup>                                                   |

RNO3, Lumped Organic Nitrates.

Table S9: Detailed information on sCI + organic acid. Three organic acids, i.e., formic acid (HCOOH), acetic acid (CCOOH), and higher organic acid (RCOOH), were considered. A previous study<sup>5</sup> suggested HCOOH acts as a catalyst to decompose SCI. Products were estimated from SCI unimolecular decomposition and represented in the expressions in SAPRC-07. Rate constants are suggested values in the previous study<sup>4</sup>.

| SCI    | Products                                                     |                                              |                                              | Rate Constant<br>( $\text{cm}^3 \text{ molec}^{-1} \text{ s}^{-1}$ ) |
|--------|--------------------------------------------------------------|----------------------------------------------|----------------------------------------------|----------------------------------------------------------------------|
|        | + HCOOH                                                      | + CCOOH                                      | + RCOOH                                      |                                                                      |
| SCI1   | ROOH                                                         | ROOH                                         | ROOH                                         | $1.2 \times 10^{-10}$                                                |
| ESCI2  | ROOH                                                         | ROOH                                         | R6OOH                                        | $3.8 \times 10^{-10}$                                                |
| ZSCI2  | $\text{CO} + 2 \cdot \text{OH} + \text{HCHO} + \text{HCOOH}$ | $\text{xRCHO} + \text{OH} + \text{CCOOH}$    | $\text{xRCHO} + \text{OH} + \text{RCOOH}$    | $2.1 \times 10^{-10}$                                                |
| ESCI3  | ROOH                                                         | R6OOH                                        | R6OOH                                        | $3.8 \times 10^{-10}$                                                |
| ZSCI3  | $\text{xRCHO} + \text{OH} + \text{HCOOH}$                    | $\text{xRCHO} + \text{OH} + \text{CCOOH}$    | $\text{xRCHO} + \text{OH} + \text{RCOOH}$    | $2.1 \times 10^{-10}$                                                |
| SCI4   | $\text{xACETONE} + \text{OH} + \text{HCOOH}$                 | $\text{xACETONE} + \text{OH} + \text{CCOOH}$ | $\text{xACETONE} + \text{OH} + \text{RCOOH}$ | $5.0 \times 10^{-10}$                                                |
| ESCI5  | R6OOH                                                        | R6OOH                                        | R6OOH                                        | $3.8 \times 10^{-10}$                                                |
| ZSCI5  | $\text{xRCHO} + \text{OH} + \text{HCOOH}$                    | $\text{xRCHO} + \text{OH} + \text{CCOOH}$    | $\text{xRCHO} + \text{OH} + \text{RCOOH}$    | $2.1 \times 10^{-10}$                                                |
| ESCI6  | R6OOH                                                        | R6OOH                                        | R6OOH                                        | $3.8 \times 10^{-10}$                                                |
| ZSCI6  | $\text{xRCHO} + \text{OH} + \text{HCOOH}$                    | $\text{xRCHO} + \text{OH} + \text{CCOOH}$    | $\text{xRCHO} + \text{OH} + \text{RCOOH}$    | $2.1 \times 10^{-10}$                                                |
| ESCI7  | ROOH                                                         | R6OOH                                        | R6OOH                                        | $3.8 \times 10^{-10}$                                                |
| ZSCI7  | ROOH                                                         | R6OOH                                        | R6OOH                                        | $2.1 \times 10^{-10}$                                                |
| ESCI8  | $\text{xMVK} + \text{OH} + \text{HCOOH}$                     | $\text{xMVK} + \text{OH} + \text{CCOOH}$     | $\text{xMVK} + \text{OH} + \text{RCOOH}$     | $3.8 \times 10^{-10}$                                                |
| ZSCI8  | R6OOH                                                        | R6OOH                                        | R6OOH                                        | $2.1 \times 10^{-10}$                                                |
| ESCI9  | R6OOH                                                        | R6OOH                                        | R6OOH                                        | $3.8 \times 10^{-10}$                                                |
| ZSCI9  | R6OOH                                                        | R6OOH                                        | R6OOH                                        | $2.1 \times 10^{-10}$                                                |
| ESCI10 | PRD2 + HCOOH                                                 | PRD2 + CCOOH                                 | PRD2 + RCOOH                                 | $3.8 \times 10^{-10}$                                                |
| ZSCI10 | $\text{xPROD2} + \text{OH} + \text{HCOOH}$                   | $\text{xPROD2} + \text{OH} + \text{CCOOH}$   | $\text{xPROD2} + \text{OH} + \text{RCOOH}$   | $2.1 \times 10^{-10}$                                                |
| ESCI11 | $\text{xPROD2} + \text{OH} + \text{HCOOH}$                   | $\text{xPROD2} + \text{OH} + \text{CCOOH}$   | $\text{xPROD2} + \text{OH} + \text{RCOOH}$   | $3.8 \times 10^{-10}$                                                |
| ZSCI11 | PRD2                                                         | PRD2 + CCOOH                                 | PRD2 + RCOOH                                 | $2.1 \times 10^{-10}$                                                |
| ESCI12 | ROOH                                                         | R6OOH                                        | R6OOH                                        | $3.8 \times 10^{-10}$                                                |
| ZSCI12 | ROOH                                                         | R6OOH                                        | R6OOH                                        | $2.1 \times 10^{-10}$                                                |
| ESCI13 | ROOH                                                         | ROOH                                         | R6OOH                                        | $3.8 \times 10^{-10}$                                                |
| ZSCI13 | ROOH                                                         | ROOH                                         | R6OOH                                        | $2.1 \times 10^{-10}$                                                |
| ESCI14 | RCHO                                                         | RCHO + CCOOH                                 | RCHO + RCOOH                                 | $3.8 \times 10^{-10}$                                                |
| ZSCI14 | ROOH                                                         | R6OOH                                        | R6OOH                                        | $3.8 \times 10^{-10}$                                                |

ROOH, Lumped organic hydroperoxides with 2–4 carbons; R6OOH, Lumped organic hydroperoxides with 5 or more carbons; PRD2, Ketones and other non-aldehyde oxygenated products that react with OH radicals faster than  $5 \times 10^{-12} \text{ cm}^3 \text{ molec}^{-2} \text{ sec}^{-1}$ .

xRCHO, Formation of RCHO from alkoxy radicals formed in peroxy radical reactions with NO and NO<sub>3</sub> (100% yields) and RO<sub>2</sub> (50% yields); xACETONE, same as xRCHO, but for

acetone; xMVK, same as xRCHO, but for MVK (methyl vinyl ketone); xPROD2 same as xRCHO, but for PRD2.

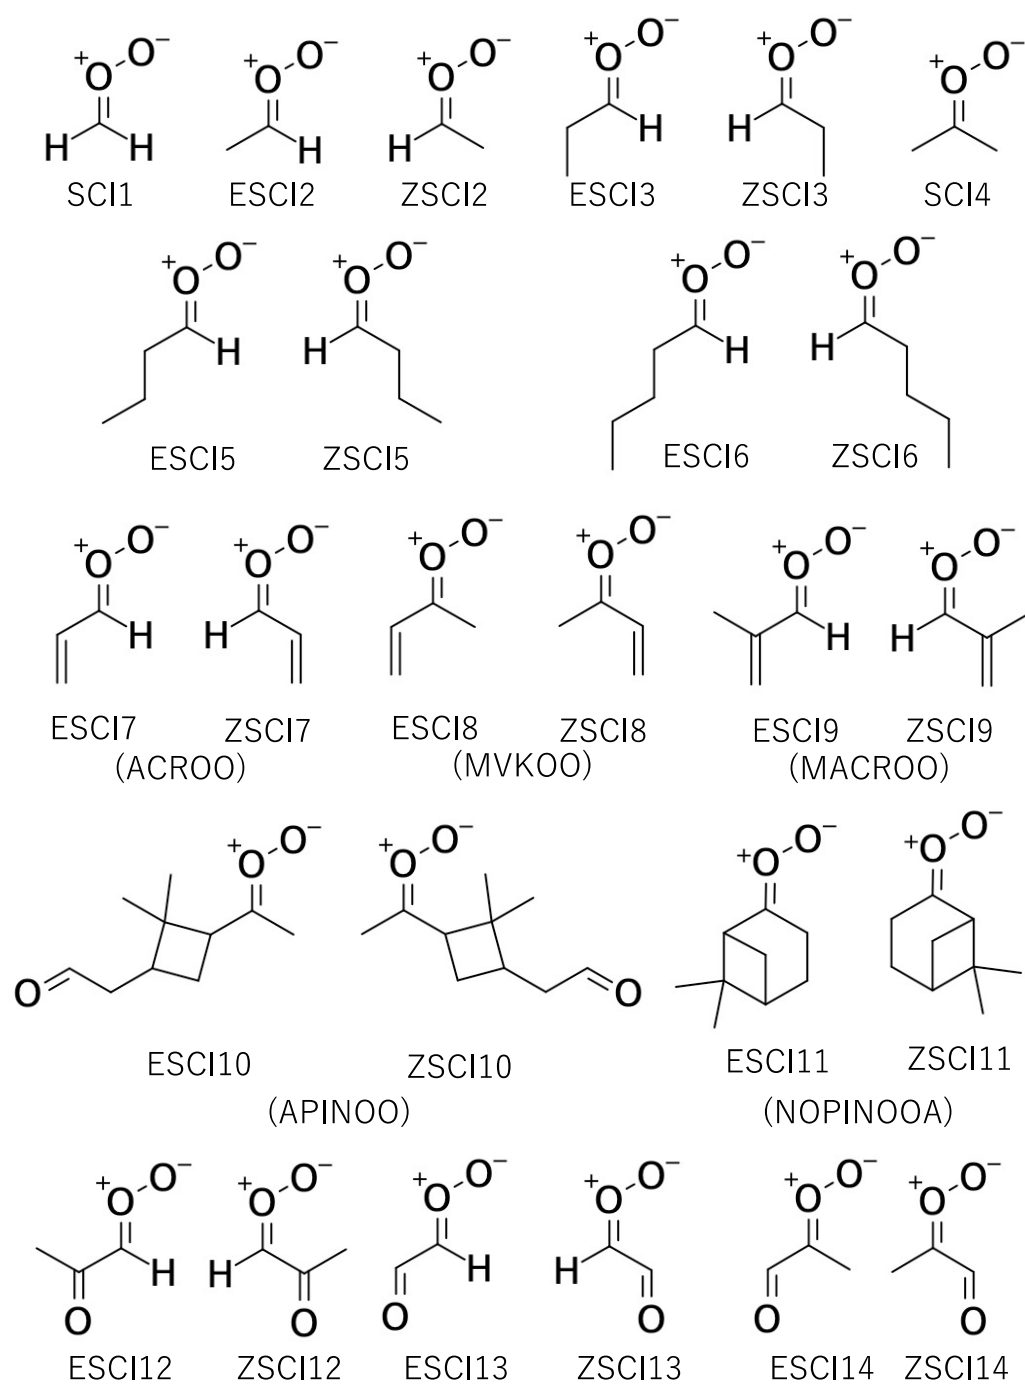

Figure S1: Chemical structures of sCIs applied in this study. Stereoisomers were depicted explicitly. Words inside parentheses are common names of SCIs. The structure was depicted by Marvin Sketch (<https://chemaxon.com/marvin>).

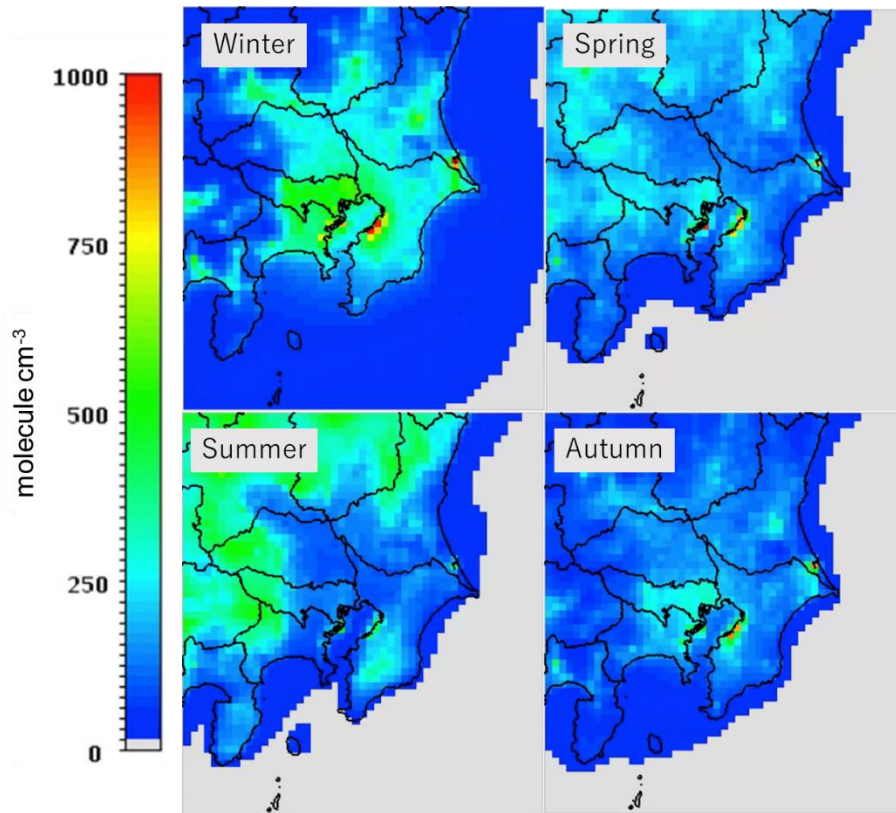

Figure S2: Seasonal change in episode average sCI concentration distributions.

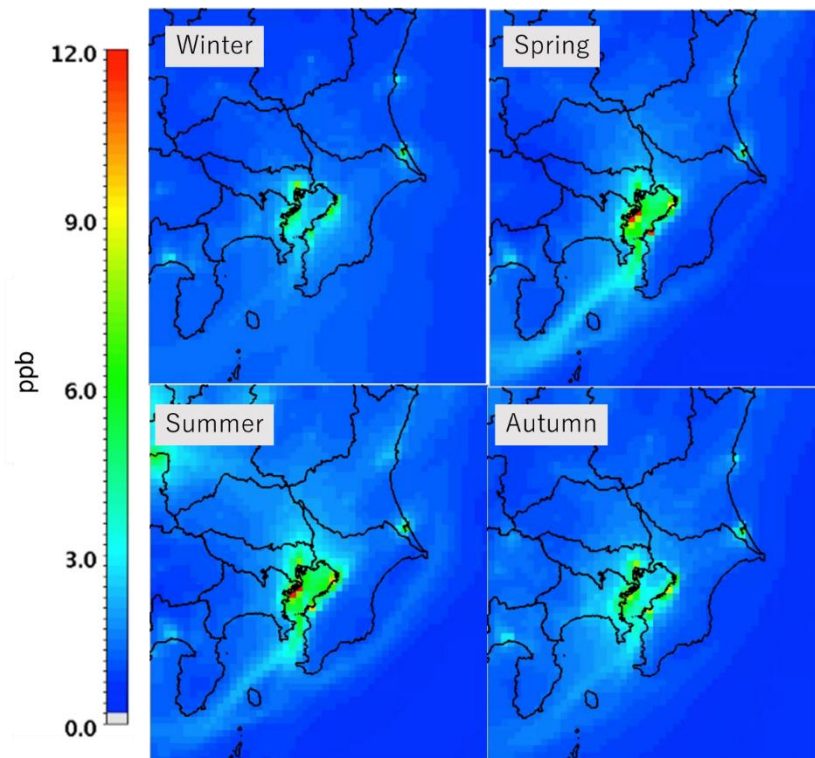

Figure S3: Seasonal change in episode average SO<sub>2</sub> concentration distributions.



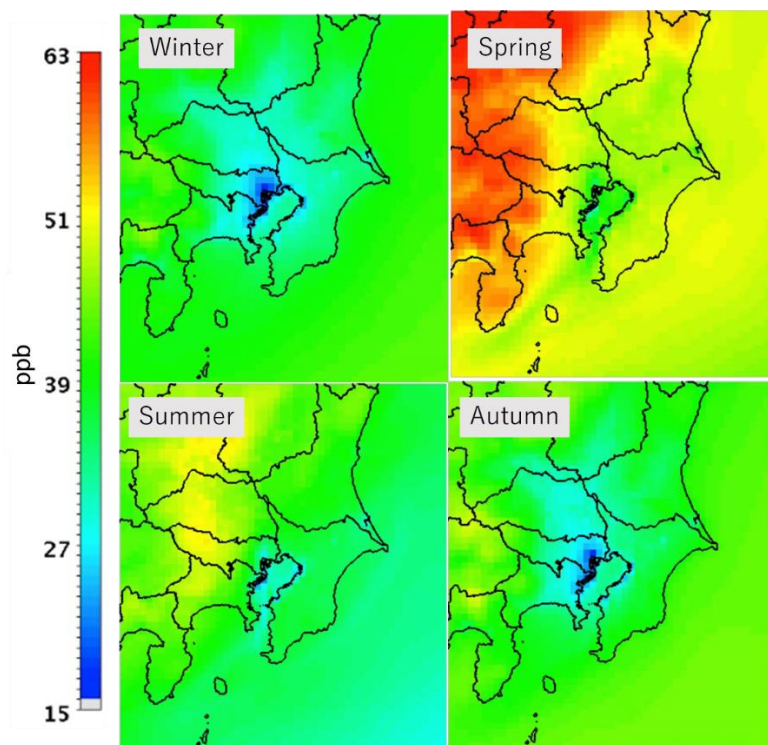

Figure S4: Seasonal change in episode average  $O_3$  concentration distributions.

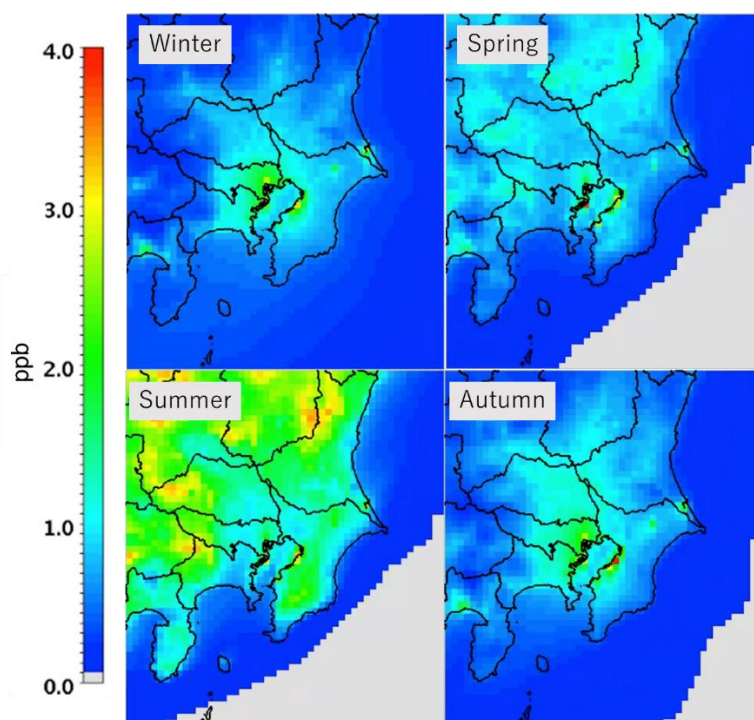

Figure S5: Seasonal change in episode average concentration distribution of VOCs, which generate sCIs.

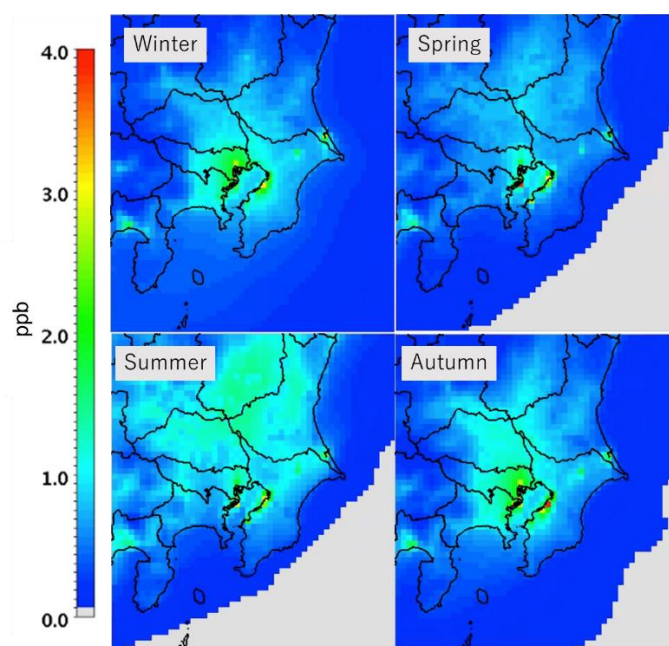

Figure S6: Seasonal change in episode average concentration distribution of AVOCs: ethene, propene, 1,3-butadiene, terminal alkene (OLE1), and internal alkene (OLE2).

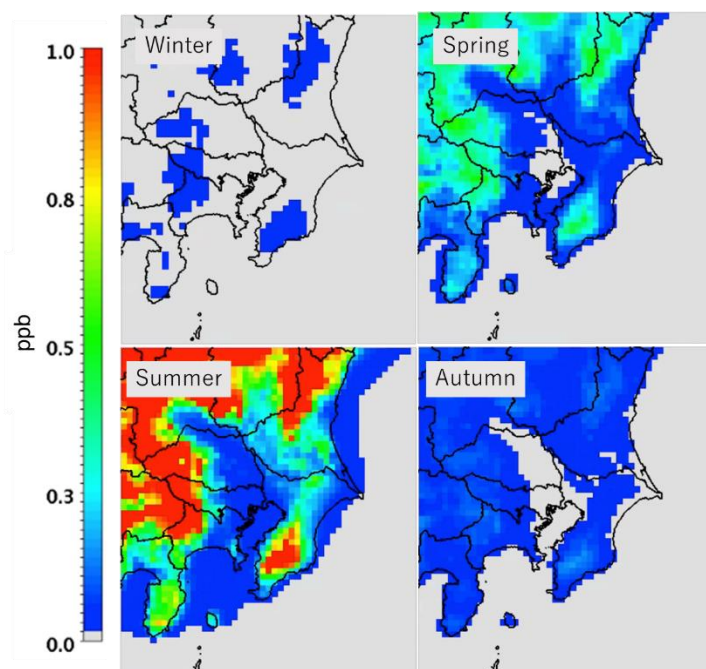

Figure S7: Seasonal change in episode average concentration distribution of BVOCs: isoprene,  $\alpha$ -pinene, terpenes, and sesquiterpenes.

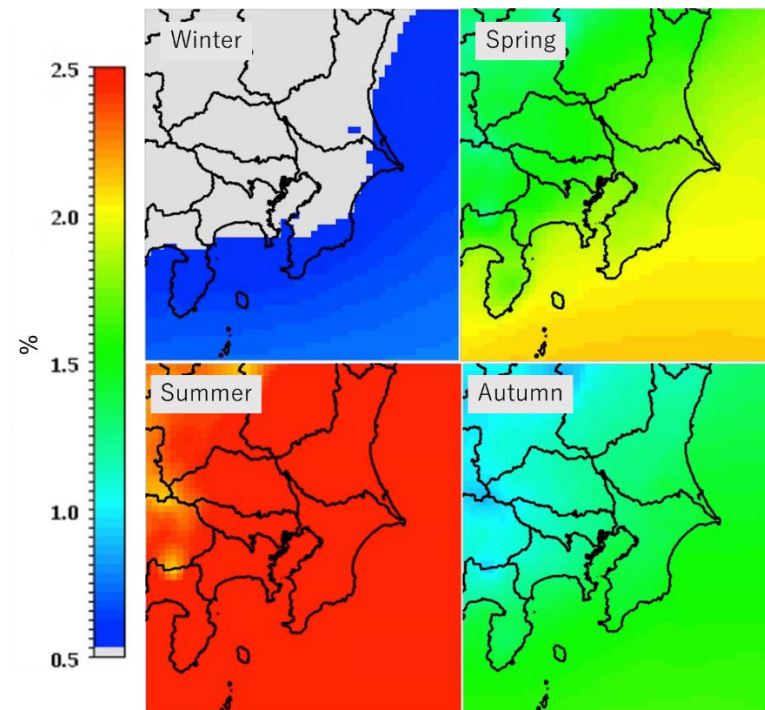

Figure S8: Seasonal change in episode average concentration distribution of water vapor.

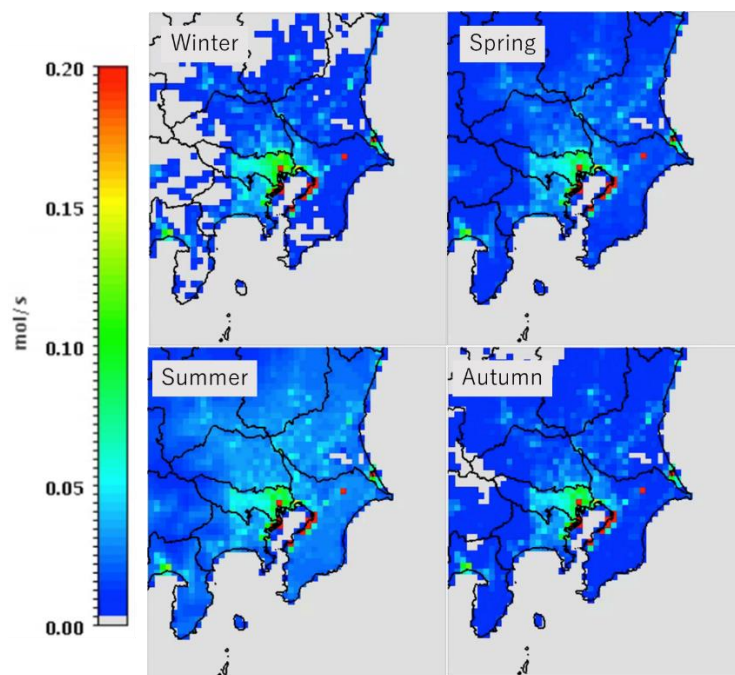

Figure S9: Seasonal change in episode average emissions distribution of AVOCs.



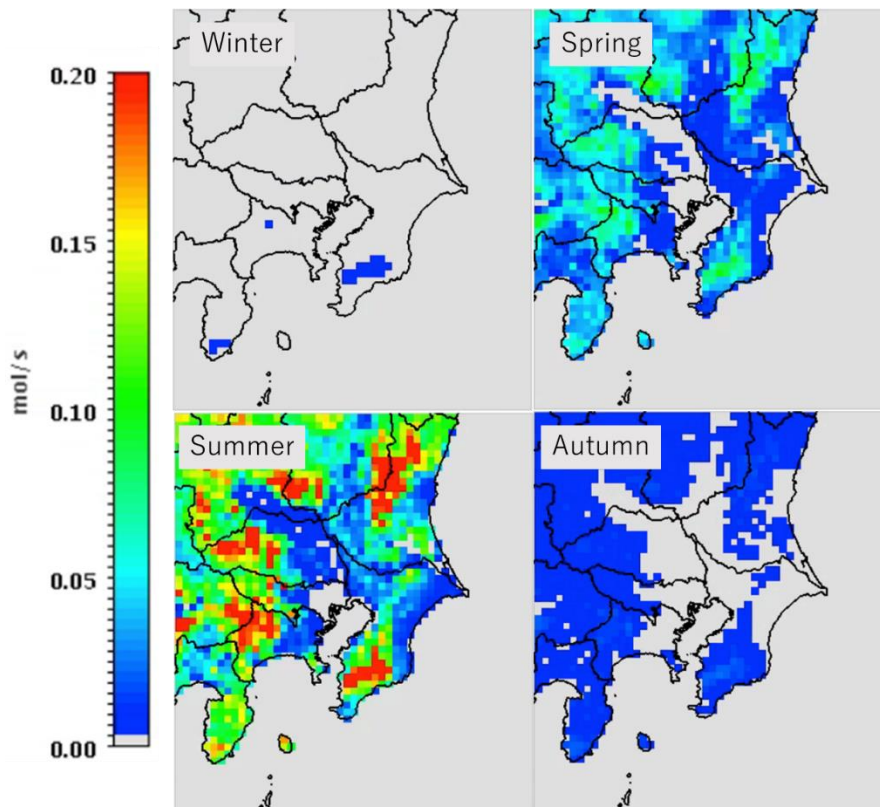

Figure S10: Seasonal change in episode average emissions distribution of BVOCs.

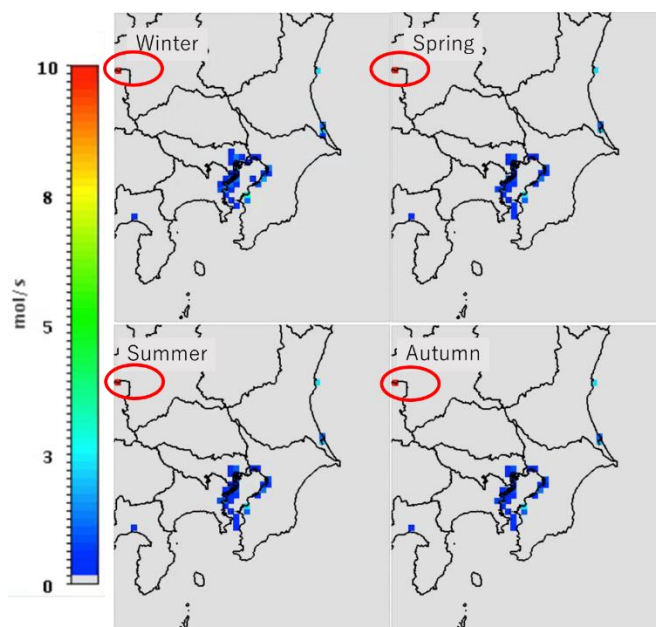

Figure S11: Seasonal change in episode average emissions distribution of  $\text{SO}_2$ . The spot shown with a red circle is the emissions from a volcano (Mt. Asama), which reached 52, 69, 235, and 214 mol/s in winter, spring, summer, and autumn, respectively.

Table S10: Contribution of three sCIs-loss processes in the standard atmospheric condition, which are determined dependent on calculated results. The unit is  $s^{-1}$  and major sCIs in the targeted region of this study are highlighted in green.

| sCIs   | Unimolecular Decomposition | Water    | Other Reactions | Total Loss |
|--------|----------------------------|----------|-----------------|------------|
| SCI1   | 0.3                        | 575.0    | 16.7            | 592.0      |
| ESCI2  | 53.0                       | 14,200.0 | 23.7            | 14,276.7   |
| ZSCI2  | 136.0                      | 0.5      | 16.9            | 153.4      |
| ESCI3  | 74.0                       | 9,800.0  | 23.7            | 9,897.7    |
| ZSCI3  | 205.0                      | 1.2      | 16.9            | 223.0      |
| SCI4   | 478.0                      | 5.6      | 25.6            | 509.1      |
| ESCI5  | 92.0                       | 9,650.0  | 23.7            | 9,765.7    |
| ZSCI5  | 127.0                      | 1.2      | 16.9            | 145.1      |
| ESCI6  | 92.0                       | 9,650.0  | 23.7            | 9,765.7    |
| ZSCI6  | 127.0                      | 1.2      | 16.9            | 145.1      |
| ESCI7  | 14.0                       | 66.5     | 23.7            | 104.2      |
| ZSCI7  | 4,000.0                    | 0.1      | 16.9            | 4,017.0    |
| ESCI8  | 50.0                       | 0.1      | 23.7            | 73.8       |
| ZSCI8  | 7,701.6                    | 1.4      | 16.9            | 7,719.8    |
| ESCI9  | 10.0                       | 131.0    | 23.7            | 164.7      |
| ZSCI9  | 2,500.4                    | 0.1      | 16.9            | 2,517.3    |
| ESCI10 | 62.0                       | 9,700.0  | 23.7            | 9,785.7    |
| ZSCI10 | 634.0                      | 1.0      | 16.9            | 651.9      |
| ESCI11 | 375.0                      | 1.2      | 23.7            | 399.9      |
| ZSCI11 | 2.0                        | 270.0    | 17.5            | 289.5      |
| ESCI12 | 0.1                        | 3.9      | 23.7            | 27.6       |
| ZSCI12 | 19.0                       | 2,288.0  | 16.9            | 2,323.9    |
| ESCI13 | 0.0                        | 3.9      | 23.7            | 27.6       |
| ZSCI13 | 140.0                      | 495.0    | 16.9            | 651.9      |
| ESCI14 | 3.8                        | 0.0      | 23.7            | 27.5       |
| ZSCI14 | 71,000.0                   | 8,500.0  | 18.1            | 79,518.1   |

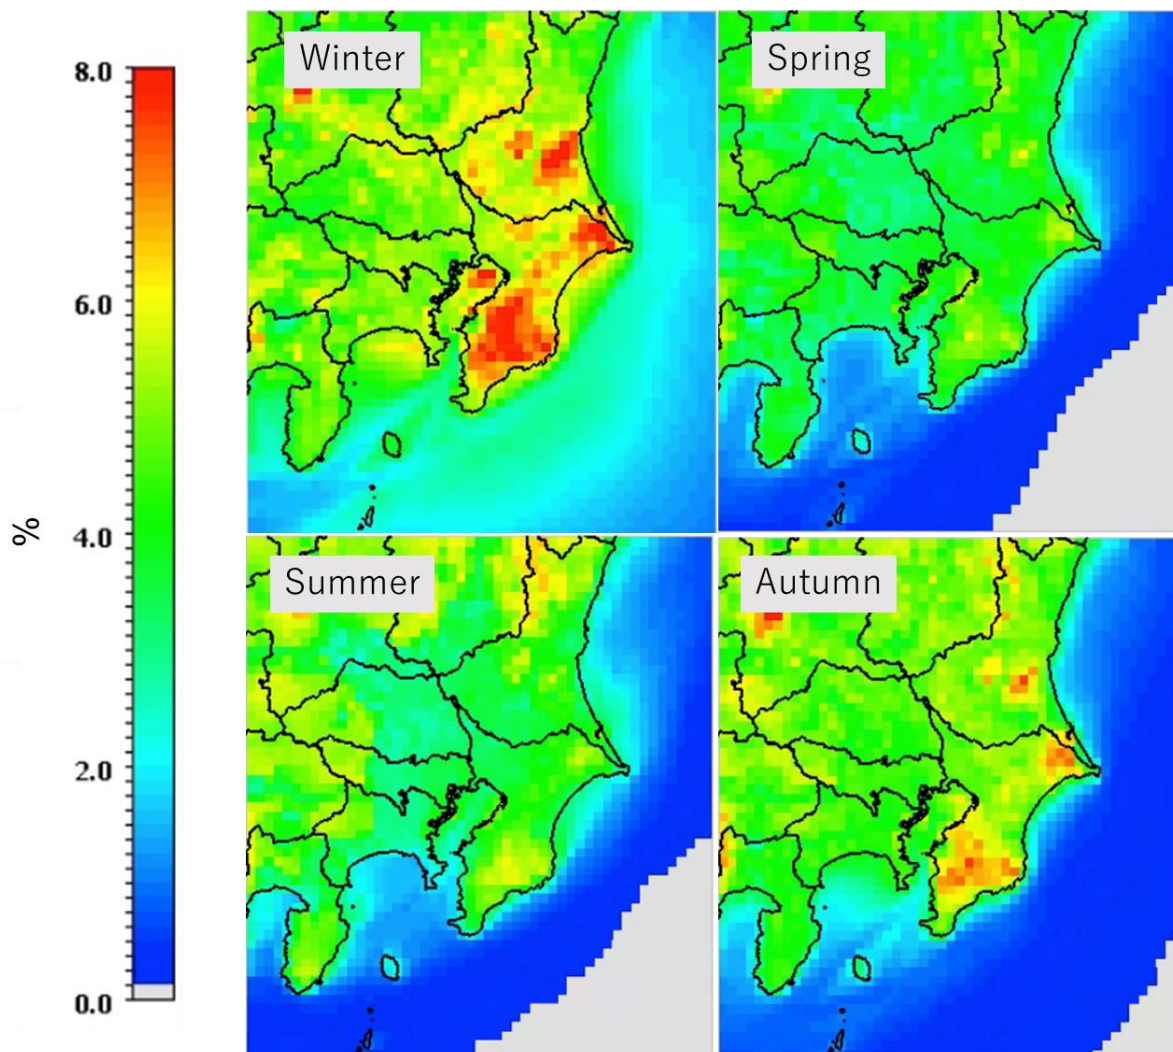

Figure S12: Seasonal changes in the average episode distribution of the increased OH.

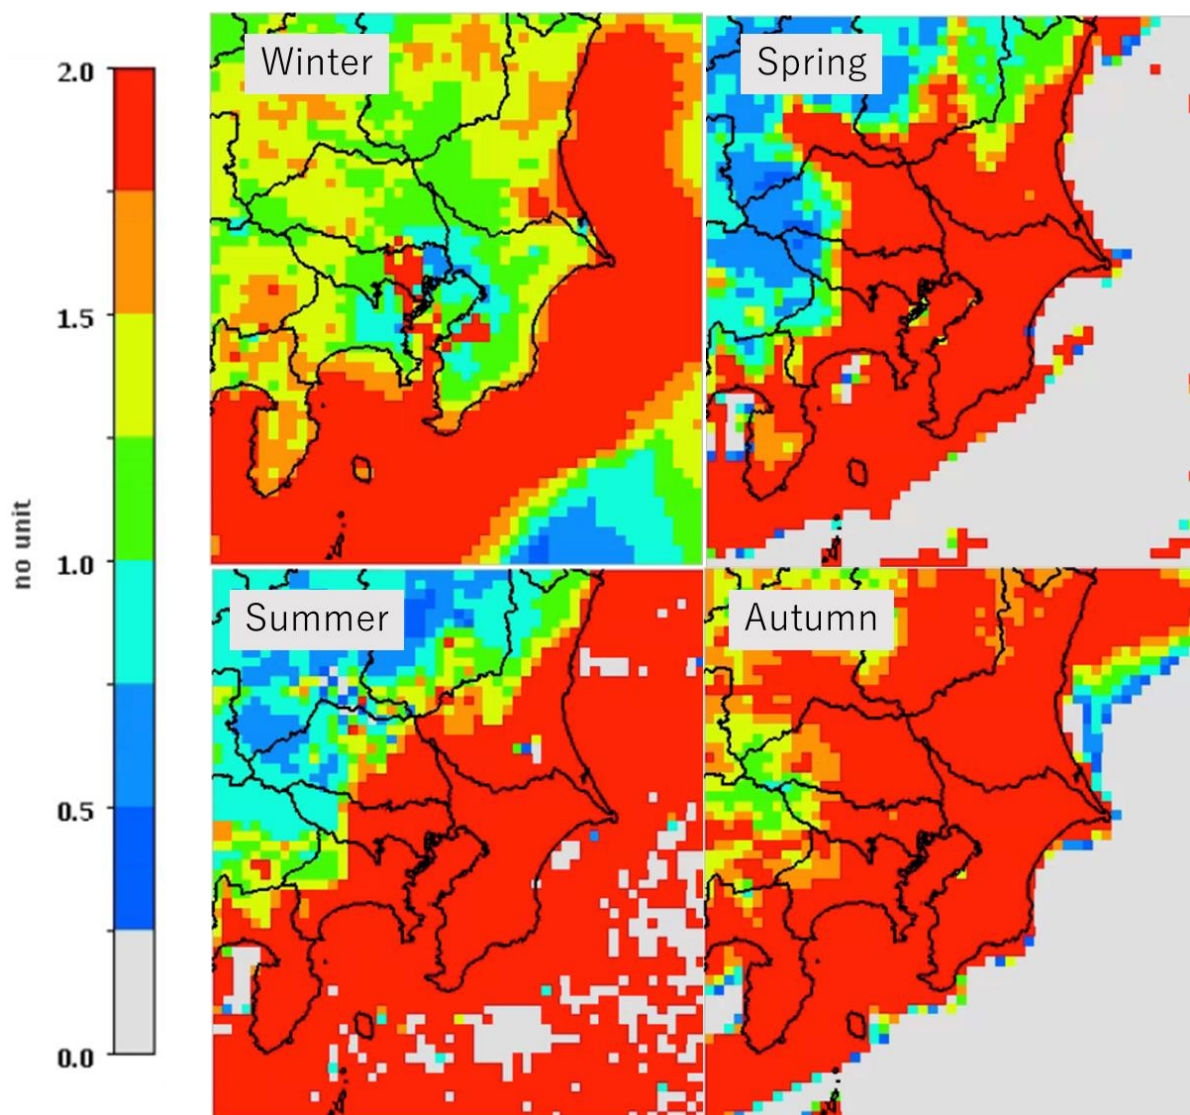

Figure S13: Seasonal average distribution of the ratio of  $k_{\text{OH}}\Delta[\text{OH}] / k_{\text{CI}}\Delta[\text{CI}]$  where  $k_{\text{OH}}$  is the rate constant of the reaction of  $\text{SO}_2 + \text{OH}$  at 298 K ( $1.3 \times 10^{-12} \text{ cm}^3 \text{ molecule}^{-1} \text{ s}^{-1}$ ) and  $k_{\text{CI}}$  is that of  $\text{SO}_2 + \text{sCIs}$ .  $\Delta[\text{OH}]$  and  $\Delta[\text{CI}]$  are the changes on the concentration of OH and sCIs before and after the incorporation of sCIs chemistry to the chemical mechanism of SAPRC-07, respectively.

## References

- 1 L. Sheps, B. Rotavera, A. J. Eskola, D. L. Osborn, C. A. Taatjes, K. Au, D. E. Shallcross, M. A. H. Khan and C. J. Percival, *Physical Chemistry Chemical Physics*, 2017, **19**, 21970–21979.
- 2 L. Vereecken, A. Novelli and D. Taraborrelli, *Physical Chemistry Chemical Physics*, 2017, **19**, 31599–31612.
- 3 P. Raghunath, Y. P. Lee and M. C. Lin, *Journal Physical Chemistry A*, 2017, **121**, 3871–3878.
- 4 E. S. Foreman, K. M. Kapnas and C. Murray, *Angewandte Chemie - International Edition*, 2016, **55**, 10419–10422.
- 5 M. Kumar, D. H. Busch, B. Subramaniam and W. H. Thompson, *Physical Chemistry Chemical Physics*, 2014, **16**, 22968–22973.
